# Supplementary material
Source: PubMed Central journal article supplement (PMC7028896)
Supplement: 13280_2019_1238_MOESM1_ESM.pdf [file 13280_2019_1238_MOESM1_ESM.pdf]

**Ambio**

Electronic Supplementary Material

*This supplementary material has not been peer reviewed*

**Title: Protection of wetlands as a strategy for reducing the spread of avian influenza from migratory waterfowl**

Tong Wu, Charles Perrings, Chenwei Shang, James P. Collins, Peter Daszak, Ann Kinzig, Ben A. Minter

**Table S1: Land cover classifications use in the raster map for spatial analyses.**

| <b>Primary classification</b> | <b>Subsidiary classification</b>  |
|-------------------------------|-----------------------------------|
| 1 Agricultural                | 11 Rice paddy                     |
|                               | 12 Dry farmland                   |
| 2 Forest                      | 21 Woodland                       |
|                               | 22 Shrubland                      |
|                               | 23 Sparsely forested woodland     |
|                               | 24 Other forest                   |
| 3 Grassland                   | 31 High coverage grassland        |
|                               | 32 Middle coverage grassland      |
|                               | 33 Low coverage grassland         |
| 4 Water                       | 41 Rivers and canals              |
|                               | 42 Lake                           |
|                               | 43 Reservoir and other artificial |
|                               | 44 Glacier                        |
|                               | 45 Tidal marsh                    |
|                               | 46 Shoal and reeds                |
| 5 Built-up land               | 51 Cities and towns               |
|                               | 52 Rural settlements              |
|                               | 53 Industry and transport         |
| 6 Other                       | 61 Sandy land                     |
|                               | 62 Gobi desert                    |
|                               | 63 Saline/alkaline land           |
|                               | 64 Swampland                      |
|                               | 65 Bare land                      |
|                               | 66 Rock and gravel                |
|                               | 67 Other unused land              |

**Table S2: Results for models of risk factors of H5N1 poultry outbreaks in China, from January 1, 2004 to September 20, 2017. Odds ratios and p-levels are reported (latter in parentheses). All are significant at the 1 per cent level. Controls were generated at a ratio of 5 for each 1 case, distributed randomly over the map without reference to administrative boundaries. Results from columns (a), (b) and (c)**

differed because of different values for rice paddy area radius. The variables “Proximity to nearest unprotected large water body” and “Proximity to nearest Ramsar wetland” were unit-less because they were normalized (see Methods section).

| Variables                                                | Units           | H5N1 Poultry Outbreaks |                 |                 |
|----------------------------------------------------------|-----------------|------------------------|-----------------|-----------------|
|                                                          |                 | (a)                    | (b)             | (c)             |
| <i>Proximity to nearest unprotected large water body</i> | -               | 1.0051 (0.000)         | 1.0455 (0.000)  | 1.0418 (0.000)  |
| <i>Proximity to nearest Ramsar wetland</i>               | -               | 0.98326 (0.001)        | 0.97906 (0.000) | 0.97633 (0.000) |
| <i>Rice paddy area</i>                                   |                 |                        |                 |                 |
| <i>within 10-km radius zone</i>                          | km <sup>2</sup> | 1.0163 (0.000)         |                 |                 |
| <i>within 20-km radius zone</i>                          | km <sup>2</sup> |                        | 1.0052 (0.000)  |                 |
| <i>within 50-km radius zone</i>                          | km <sup>2</sup> |                        |                 | 1.0010 (0.000)  |
| <i>Per-capita GDP</i>                                    | ¥               | 0.99999 (0.000)        | 0.99999 (0.000) | 0.99998 (0.000) |
| <b>Observations</b>                                      |                 | 1206                   | 1206            | 1206            |
| <b>Pseudo R<sup>2</sup></b>                              |                 | 0.1940                 | 0.2205          | 0.2293          |

**Table S3: Results for models of risk factors of H5N1 poultry outbreaks in China, from January 1, 2004 to September 20, 2017. Odds ratios and p-levels are reported (latter in parentheses). All are significant at the 1 per cent level. Controls were generated at a ratio of 5 for each prefecture, regardless of the size of prefecture, to account for geographically uneven distribution of populations. Results from**

columns (a), (b) and (c) differed because of different values for rice paddy area radius. The variables “Proximity to nearest unprotected large water body” and “Proximity to nearest Ramsar wetland” were unit-less because they were normalized (see Methods section).

| Variables                                                | Units           | H5N1 Poultry Outbreaks |                 |                 |
|----------------------------------------------------------|-----------------|------------------------|-----------------|-----------------|
|                                                          |                 | (a)                    | (b)             | (c)             |
| <i>Proximity to nearest unprotected large water body</i> | -               | 1.0777 (0.000)         | 1.0735 (0.000)  | 1.0715 (0.000)  |
| <i>Proximity to nearest Ramsar wetland</i>               | -               | 0.97168 (0.000)        | 0.96936 (0.000) | 0.96834 (0.000) |
| <i>Rice paddy area</i>                                   |                 |                        |                 |                 |
| <i>within 10-km radius zone</i>                          | km <sup>2</sup> | 1.0065 (0.000)         |                 |                 |
| <i>within 20-km radius zone</i>                          | km <sup>2</sup> |                        | 1.0022 (0.000)  |                 |
| <i>within 50-km radius zone</i>                          | km <sup>2</sup> |                        |                 | 1.0004 (0.000)  |
| <i>Per-capita GDP</i>                                    | ¥               | 0.99998 (0.000)        | 0.99998 (0.000) | 0.99998 (0.000) |
| <b>Observations</b>                                      |                 | 1356                   | 1356            | 1356            |
| <b>Pseudo R<sup>2</sup></b>                              |                 | 0.1476                 | 0.1571          | 0.1571          |

**Table S4: Results for models of risk factors of H5N1 poultry outbreaks in China, from January 1, 2004 to September 20, 2017. Odds ratios and p-levels are reported (latter in parentheses). All are significant at the 1 per cent level. Controls were generated at a ratio of 5 for each case within a given province; controls were then randomly distributed within the boundaries of the province. There were five mainland provinces without reported cases during the study period: Hainan,**

Sichuan, Heilongjiang, Beijing, and Shandong. Results from columns (a), (b) and (c) differed because of different values for rice paddy area radius. The variables “Proximity to nearest unprotected large water body” and “Proximity to nearest Ramsar wetland” were unit-less because they were normalized (see Methods section).

| Variables                                                | Units           | H5N1 Poultry Outbreaks |                 |                 |
|----------------------------------------------------------|-----------------|------------------------|-----------------|-----------------|
|                                                          |                 | (a)                    | (b)             | (c)             |
| <i>Proximity to nearest unprotected large water body</i> | -               | 1.0563 (0.000)         | 1.0546 (0.000)  | 1.0551 (0.000)  |
| <i>Proximity to nearest Ramsar wetland</i>               | -               | 0.98474 (0.002)        | 0.98333 (0.001) | 0.98370 (0.002) |
| <i>Rice paddy area</i>                                   |                 |                        |                 |                 |
| <i>within 10-km radius zone</i>                          | km <sup>2</sup> | 1.0041 (0.003)         |                 |                 |
| <i>within 20-km radius zone</i>                          | km <sup>2</sup> |                        | 1.0013 (0.001)  |                 |
| <i>within 50-km radius zone</i>                          | km <sup>2</sup> |                        |                 | 1.0002 (0.004)  |
| <i>Per-capita GDP</i>                                    | ¥               | 0.99999 (0.000)        | 0.99999 (0.000) | 0.99999 (0.000) |
| <b>Observations</b>                                      |                 | 1206                   | 1206            | 1206            |
| <b>Pseudo R<sup>2</sup></b>                              |                 | 0.0861                 | 0.0883          | 0.0856          |
